# Supplementary material
Source: PubMed Central journal article supplement (PMC6904834)
Supplement: mmc3.pdf [file mmc3.pdf]

$\theta = 1 / \text{Kb}$ , 2.07 Gb of sequence

| $\rho / \text{Kb}$ | W. Africans | Europeans | East Asians | Melanesians |
|--------------------|-------------|-----------|-------------|-------------|
| 0.05               | 33.1        | 26.9      | 27.6        | 26.5        |
| 0.1                | 26.0        | 20.5      | 18.3        | 18.1        |
| 0.15               | 15.9        | 11.9      | 10.8        | 11.4        |
| 0.2                | 11.6        | 7.6       | 6.7         | 6.1         |
| 0.25               | 5.9         | 3.7       | 3.9         | 3.8         |
| 0.3                | 4.1         | 2.0       | 1.7         | 2.6         |
| 0.35               | 2.2         | 0.8       | 0.8         | 1.1         |
| 0.4                | 2.0         | 1.1       | 1.0         | 1.6         |
| Deciles            | 3.6         | 2.4       | 2.3         | 2.2         |
| Deciles * 0.5      | 7.6         | 6.2       | 5.9         | 3.4         |

$\theta = 0.7 / \text{Kb}$ , 3 Gb of sequence

| $\rho / \text{Kb}$ | W. Africans | Europeans | East Asians | Melanesians |
|--------------------|-------------|-----------|-------------|-------------|
| 0.05               | 9.7         | 7.0       | 8.1         | 7.2         |
| 0.1                | 6.8         | 5.2       | 5.7         | 4.8         |
| 0.15               | 4.8         | 2.8       | 3.2         | 3.6         |
| 0.2                | 3.0         | 2.5       | 2.2         | 3.2         |
| 0.25               | 1.2         | 0.4       | 0.4         | 0.6         |
| 0.3                | 0.9         | 0.2       | 0.3         | 0.6         |
| 0.35               | 0.7         | 0.3       | 0.5         | 0.5         |
| 0.4                | 0.6         | 0.0       | 0.0         | 0.0         |
| Deciles            | 0.8         | 0.7       | 0.9         | 0.9         |
| Deciles * 0.5      | 0.9         | 0.5       | 0.7         | 0.1         |

**Table S3. Average number of PGHs across simulations with different recombination rates.** Here, “Deciles” refers to the mean recombination rates across deciles from the YRI HapMap data. See Methods for further details.
